# Supplementary material
Source: PubMed Central journal article supplement (PMC3686330)
Supplement: mmc1.pdf [file mmc1.pdf]

## Supporting material: Minimal effect of lipid charge on membrane miscibility phase behavior

Matthew C. Blosser, Jordan B. Starr, Cameron W. Turtle, Jake Ashcraft, Sarah L. Keller\*  
Departments of Chemistry and Physics, University of Washington (Seattle, WA USA)  
\*Corresponding author

DPPC

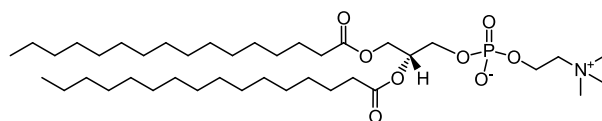

DiPhyPC

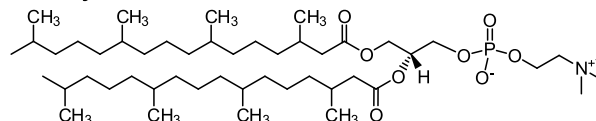

DPPG

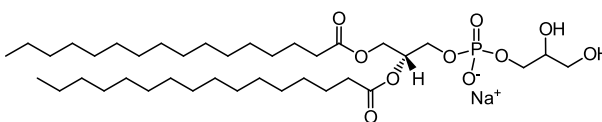

DiPhyPG

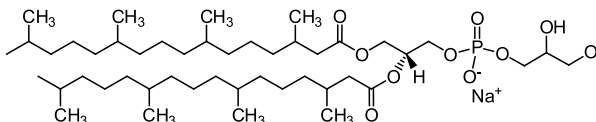

Cholesterol

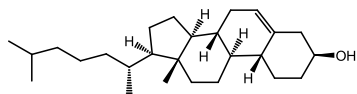

DiPhyPS

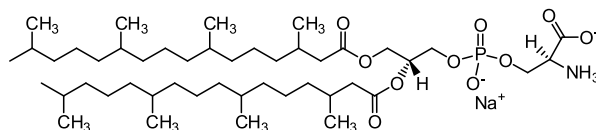

**Fig. S1**

Structures of lipids used in experiments. DPPG, DiPhyPG, and DiPhyPS are depicted with counterions that are diluted in the solutions used in this study.

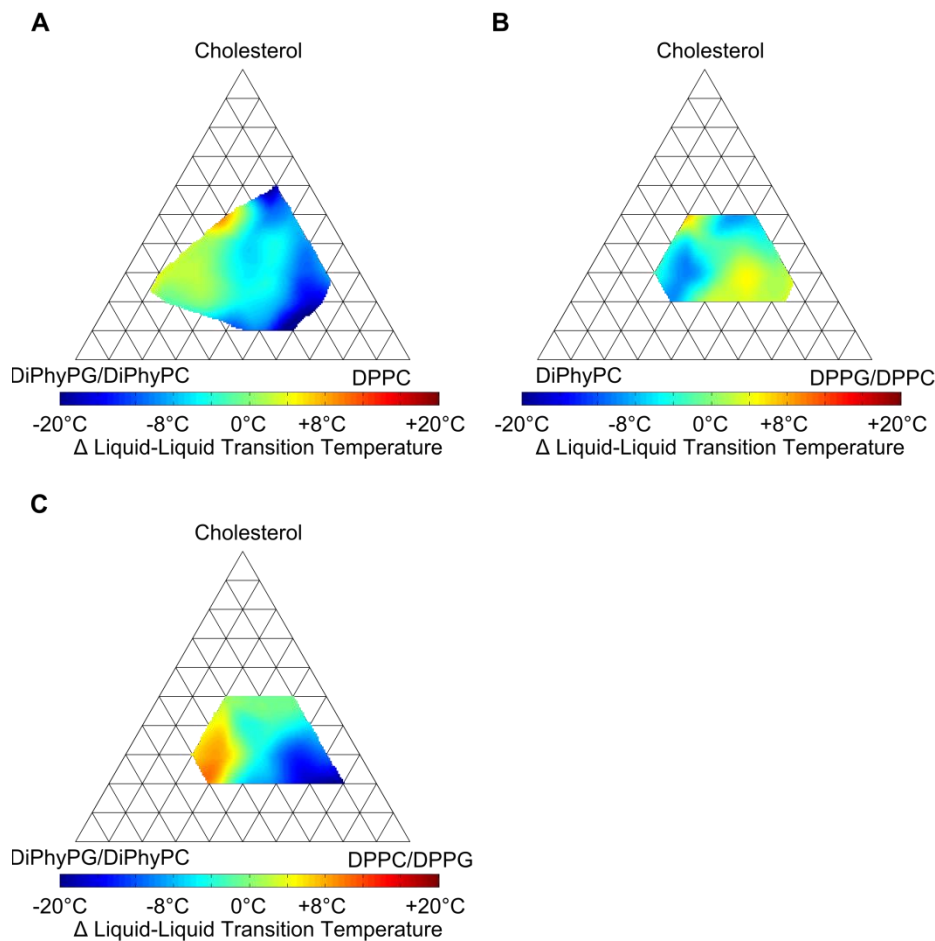

**Fig. S2**

Difference in miscibility transition temperatures ( $T_{\text{mix}}$ ) for different systems of DiPhyX:DPX:Chol, where “X” denotes either a PC-lipid or a PG-lipid. Given that uncertainties in  $T_{\text{mix}}$  at each composition are  $\pm 3$  °C, uncertainties in  $T_{\text{mix}}$  in the figures above are  $\pm 4$  °C at each point. A) DiPhyPG:DPPC:Chol minus DiPhyPC:DPPC:Chol. B) DiPhyPC:DPPG:Chol minus DiPhyPC:DPPC:Chol. For both A and B, positive values correspond to higher transition temperatures in the charged system. C) DiPhyPG:DPPC:Chol minus DiPhyPC:DPPG:Chol. For A and B, the compositions with the highest values of  $T_{\text{mix}}$  shift towards the vertex of the charged lipid. For C, the two trends in A and B are additive, and the compositions with the highest values of  $T_{\text{mix}}$  shift strongly towards the vertex of the low temperature lipid.

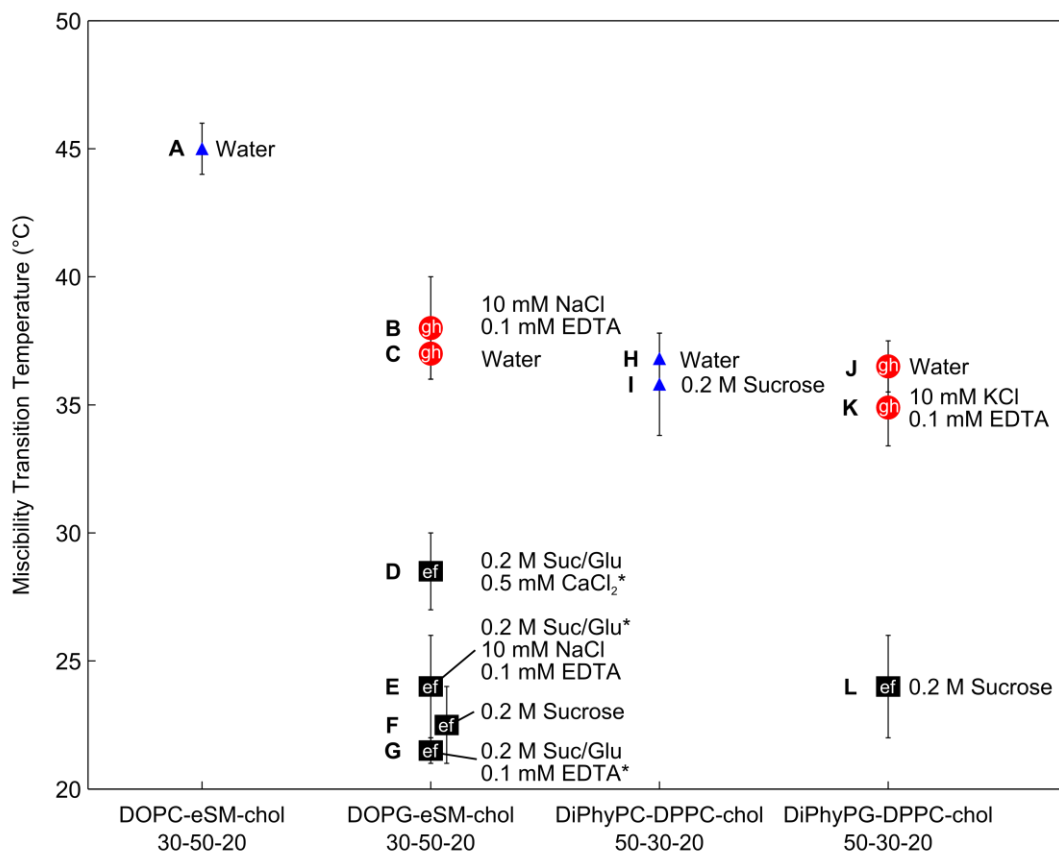

**Fig. S3**

This figure shows transition temperatures of vesicles prepared from four different lipid compositions by different methods and in different solutions. “Suc/Glu” denotes 0.2M sucrose inside of vesicles and 0.2M glucose outside. **ef** denotes vesicles prepared by electroformation that contain PG lipids as the low melting temperature species and that are in solutions with 0.2M sugar. **gh** denotes vesicles prepared by gentle hydration that contain PG lipids as the low melting temperature species. **▲** denotes vesicles formed by electroformation that contain PC as the low melting temperature lipid (that is, they contain no anionic lipids). The symbol \* denotes data from C.C. Vequi-Suplicy et al. (1).

The major finding of this figure is that the difference in miscibility transition temperature between charged vesicles produced by electroformation and those produced by gentle hydration is larger than the effect of adding: monovalent salt, divalent salt, or replacing PG with PC. Specifically, the method of vesicle preparation of charged vesicles (electroformation in sucrose vs. gentle hydration) has a very large effect on miscibility transition temperatures, on the order of 10 °C (compare point C to F, B and E, or point J to L). This effect of preparation method is larger than of adding monovalent salt (compare point C to point K, E to G, or J to K), and even than of adding divalent cations (compare point D to point G). Similarly, the effect of preparation method is larger than of replacing PC-lipids with PG-lipids (compare point H to point J, or A to C).

The figure above shows that we reproduce the general results of Vequi-Suplicy et al. because our data point F is within experimental uncertainty of point G from Vequi-Suplicy et al. Taken together, the data in the figure imply that the stunning, >20 °C drop in miscibility transition temperatures reported by Vequi-Suplicy et al. (from point A to point G) is valid, and is mostly attributable to the method of preparing charged vesicles by electroformation in sucrose vs. by gentle hydration in water (compare points C and G). Although a mechanistic explanation is beyond the scope of this study, a conclusion that is consistent with the results above is that sucrose interacts much more significantly with PG headgroups than with PC headgroups (compare points H and I).

**Phospholipid Ratio**

|                         |           |
|-------------------------|-----------|
| Ion Polarity            | Negative  |
| Ion Source Type         | ESI       |
| Capillary               | 2.60 kV   |
| Cone                    | 25.00 V   |
| Extractor               | 3.00 V    |
| RF Lens                 | 0.2 V     |
| Source Temperature      | 120 °C    |
| Desolvation Temperature | 400 °C    |
| Cone Gas Flow           | 25 L/Hr   |
| Desolvation Gas Flow    | 900 L/Hr  |
| LM Resolution           | 14.0      |
| HM Resolution           | 14.0      |
| Ion Energy 1            | 1.0       |
| Entrance                | -2        |
| Collision               | 2         |
| Exit                    | 1         |
| LM 2 Resolution         | 15.0      |
| HM 2 Resolution         | 15.0      |
| Ion Energy 2            | 2.5       |
| Multiplier              | 650       |
| Syringe Pump Flow       | 20 µL/min |

**Cholesterol Ratio:**

|                       |            |
|-----------------------|------------|
| Ion Polarity          | Positive   |
| Ion Source Type       | ESI        |
| Trap Drive            | 45.0       |
| Octopole RF Amplitude | 100.0 V    |
| Lens 2                | -60.0 V    |
| Capillary Exit        | 105.0 V    |
| Lens 1                | -5.0 V     |
| Dry Temp              | 250 °C     |
| Nebulizer             | 9.00 psi   |
| Dry Gas               | 5.00 L/min |
| HV Capillary          | 4000 V     |
| HV End Plate Offset   | -500 V     |
| Fragmentation Width   | 10.00 m/z  |
| Fragmentation Time    | 40000 µs   |
| Fragmentation Delay   | 5000 µs    |

**Table S1**

Instrument parameters for mass spectrometry. Parameters are specific to the instrument used.

**Supporting References**

1. Vequi-Suplicy, C. C., K. A. Riske, R. L. Knorr, and R. Dimova. 2010. Vesicles with charged domains. *Biochim. Biophys. Acta, Biomembr.* 1798:1338-1347.
